# Supplementary figures and images for: DNALI1 interacts with the MEIG1/PACRG complex within the manchette and is required for proper sperm flagellum assembly in mice
Source: eLife journal article supplement (doi:10.7554/elife.79620), 2023-04-21

## Figure 6 – figure supplement 1

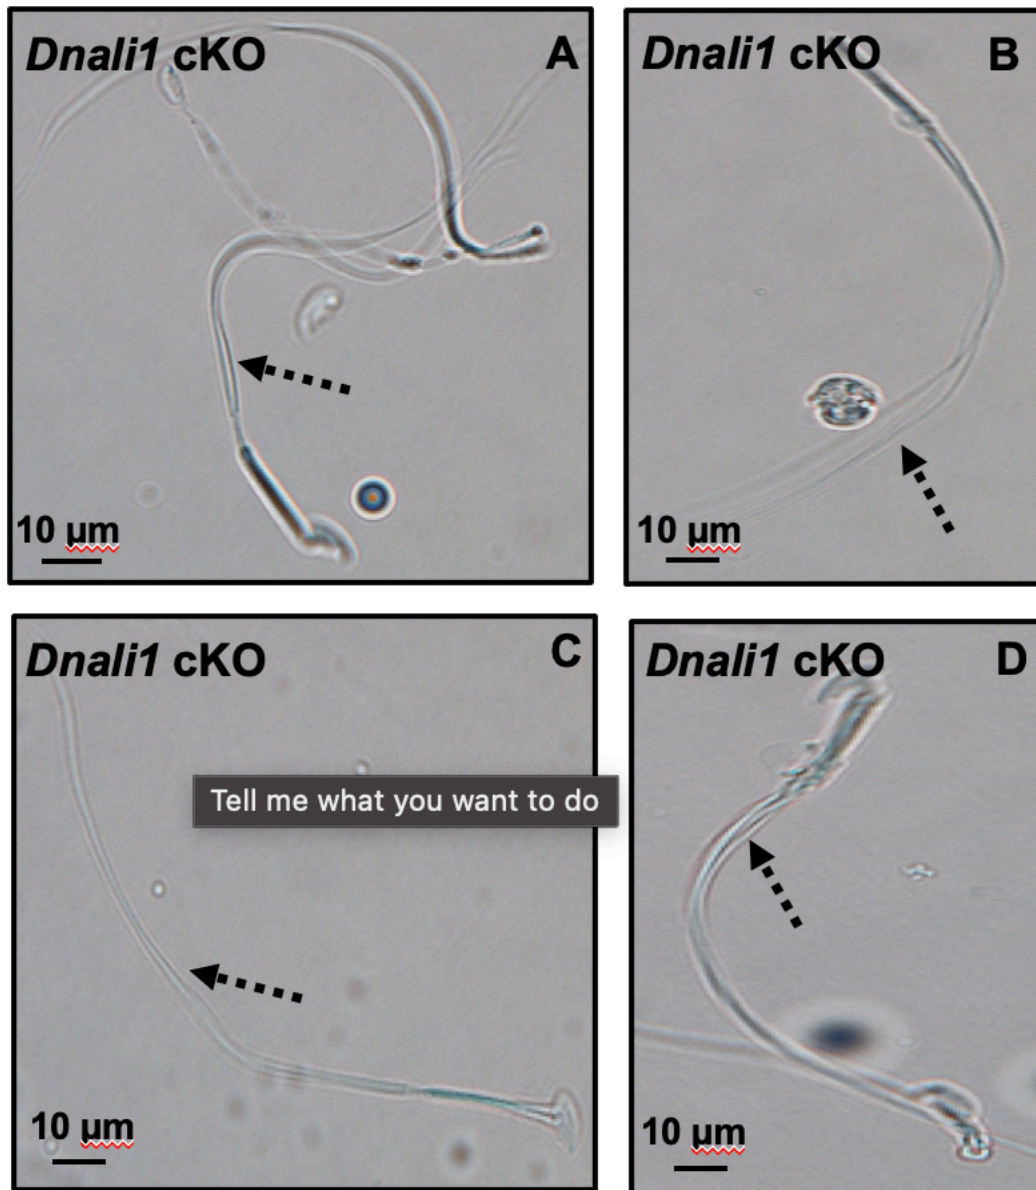

Supplement: supp [file elife-79620-supp-v1.zip]

**Figure 10 – figure supplement 1**

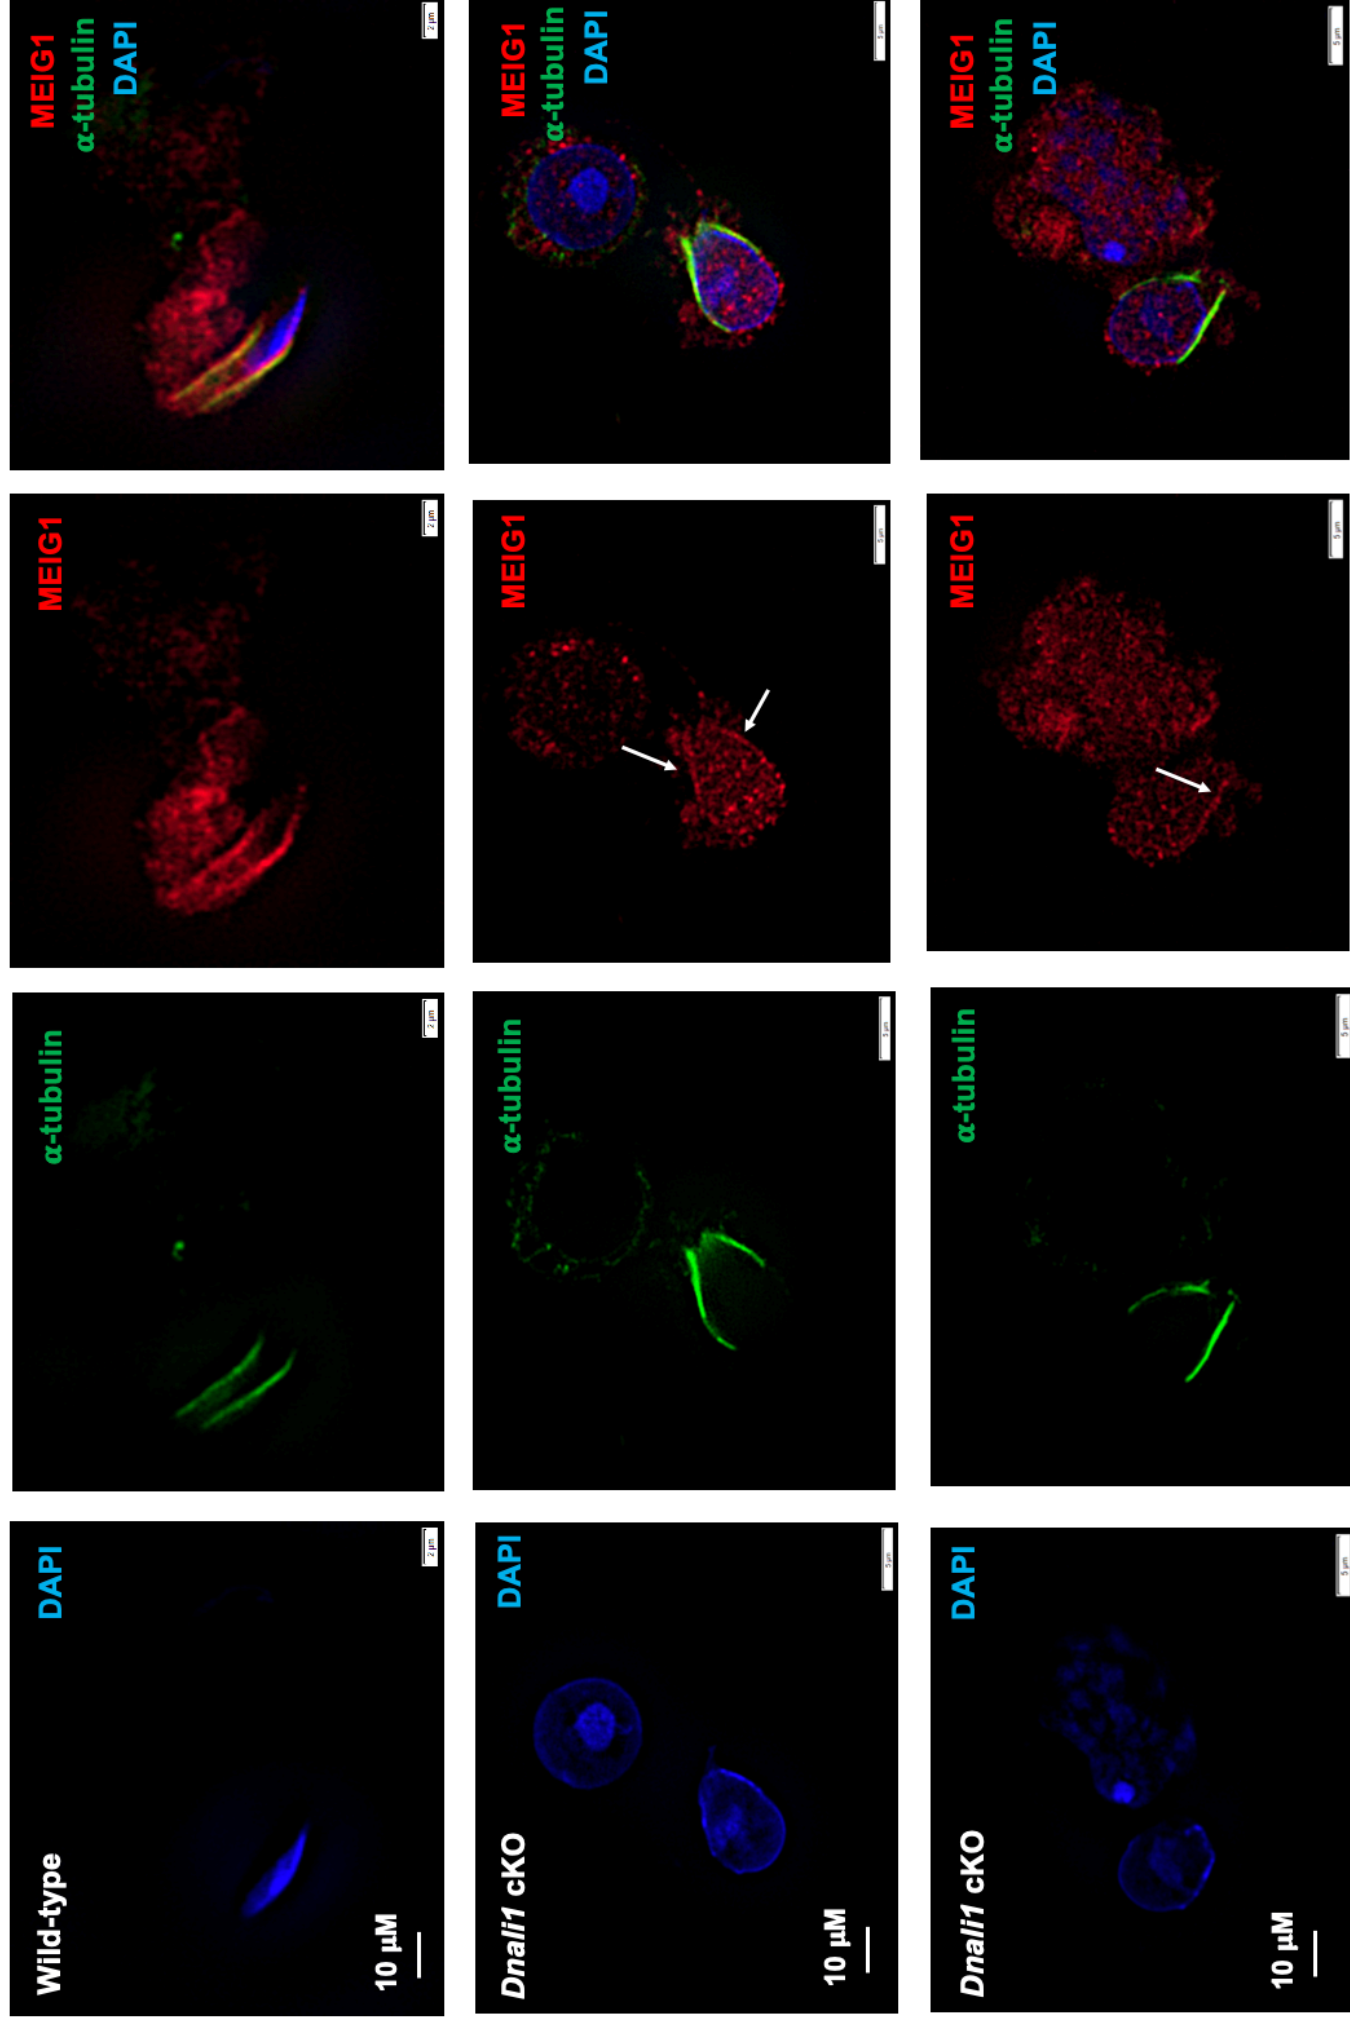

Supplement: supp [file elife-79620-supp-v1.zip]

# Figure 7 – figure supplement 1

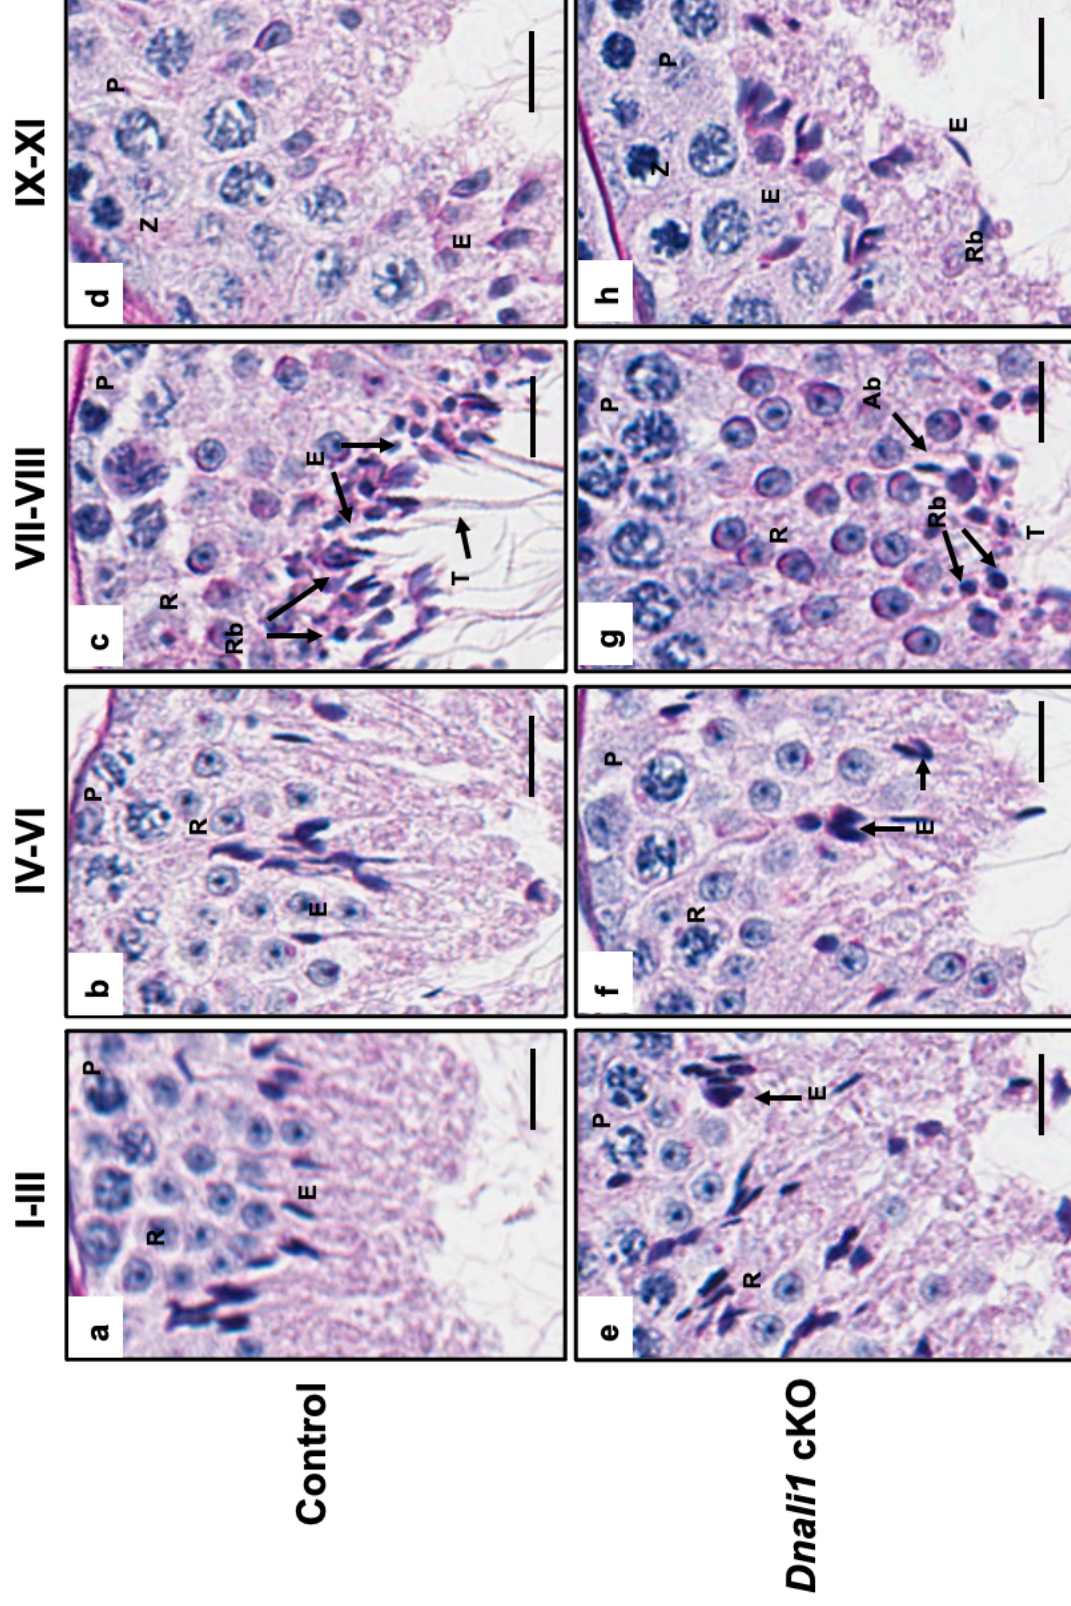

Supplement: supp [file elife-79620-supp-v1.zip]

# Figure 5 – figure supplement 1

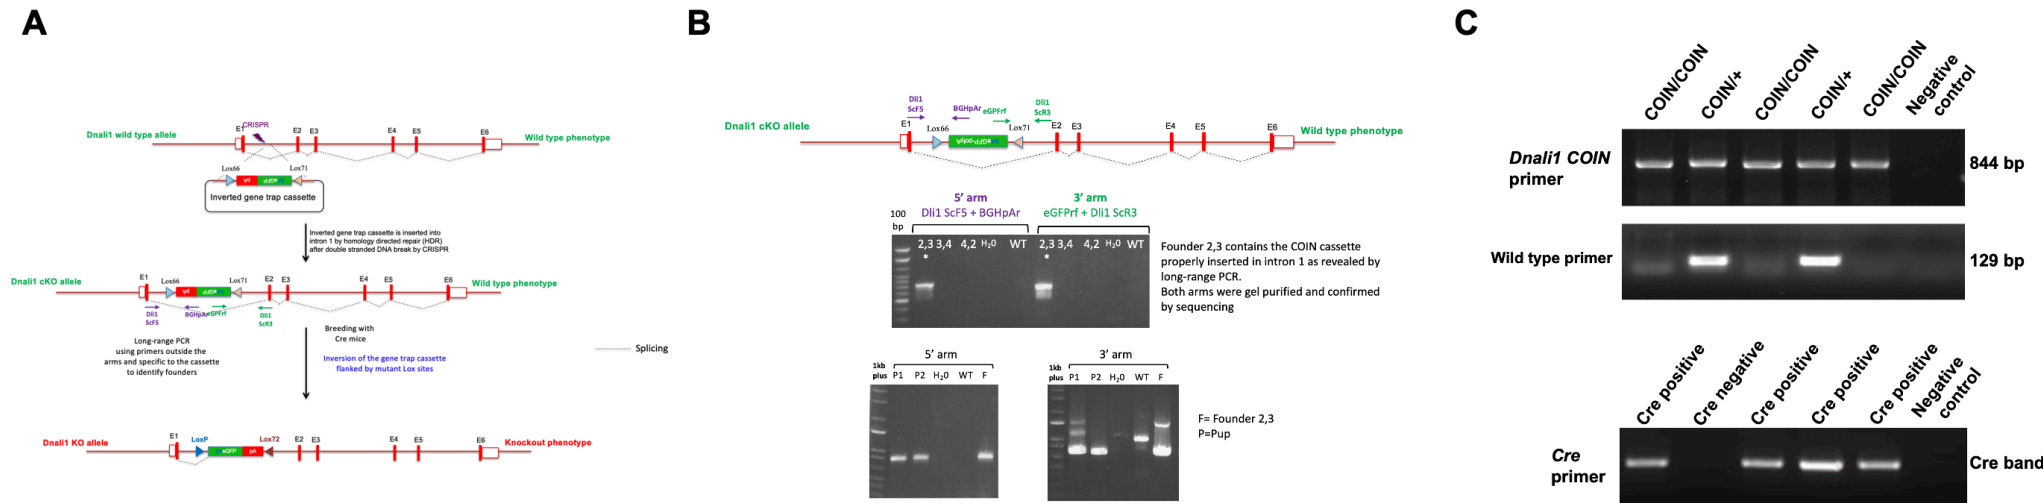

Supplement: supp [file elife-79620-supp-v1.zip]

Figure 4 – Figure Supplement 1

A

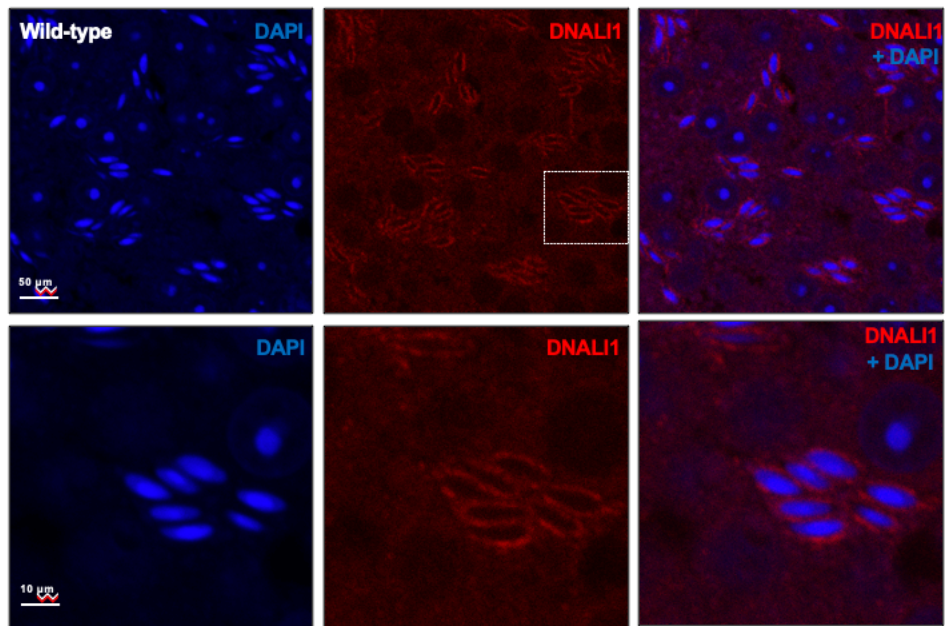

B

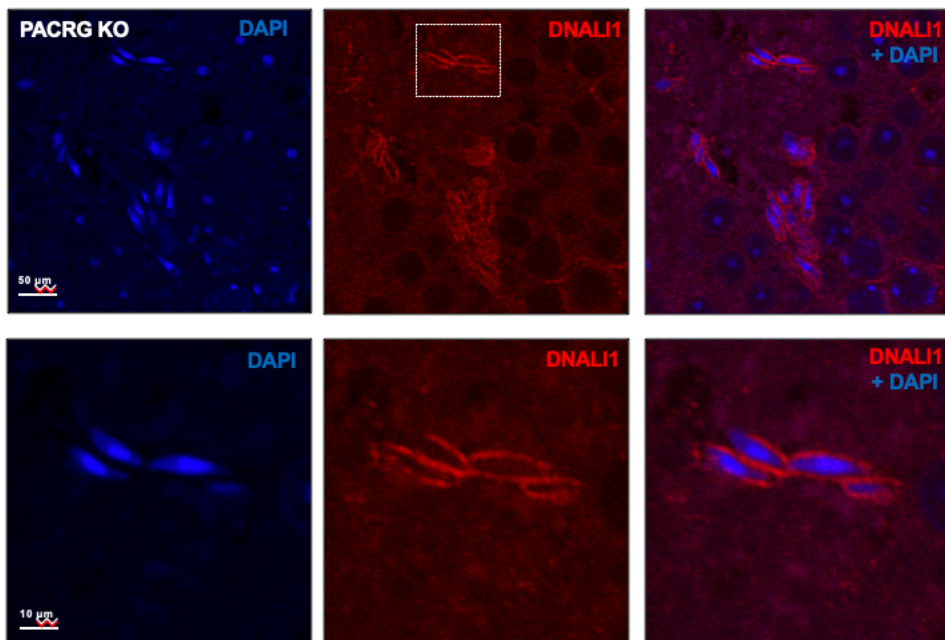

Supplement: supp [file elife-79620-supp-v1.zip]

**Figure 11 – figure supplement 2**

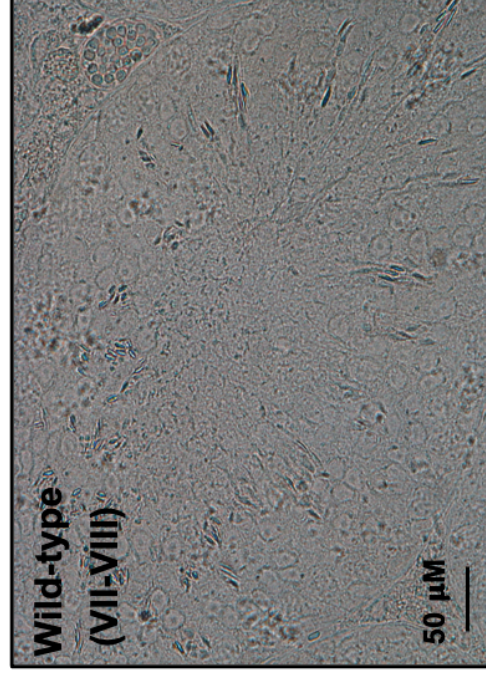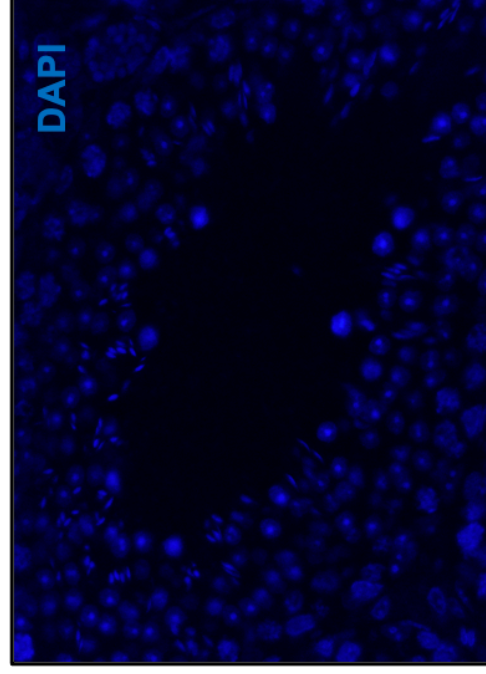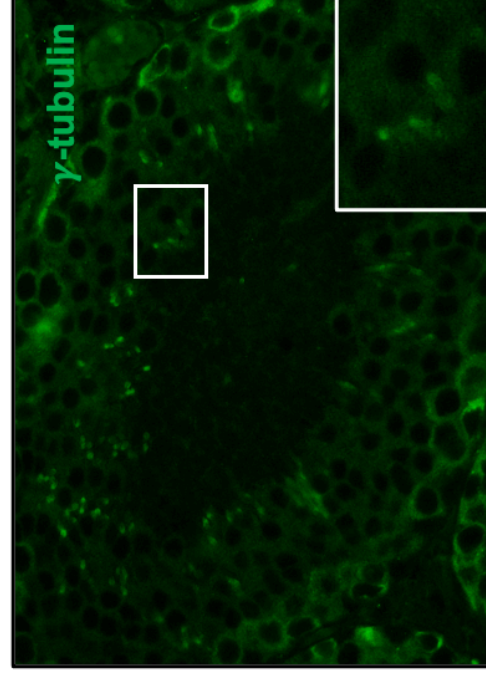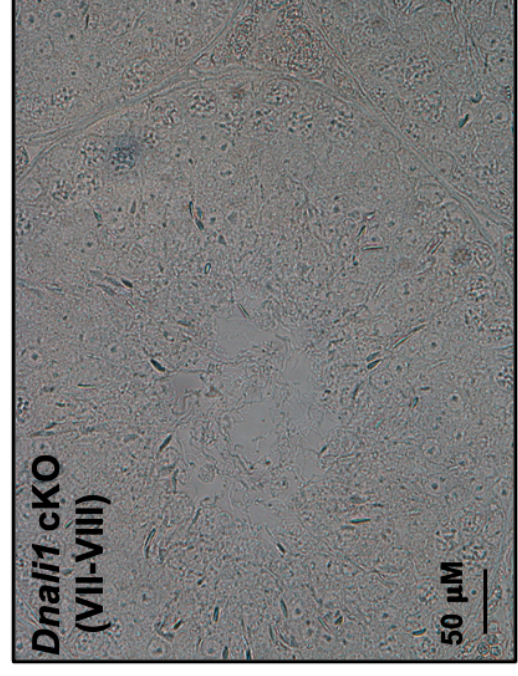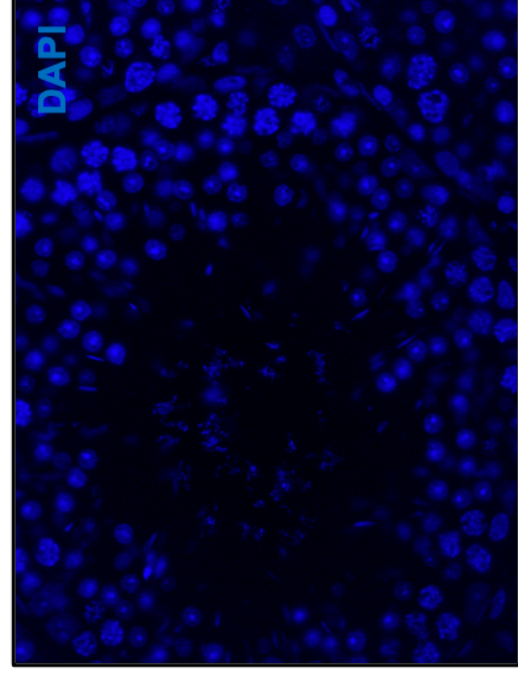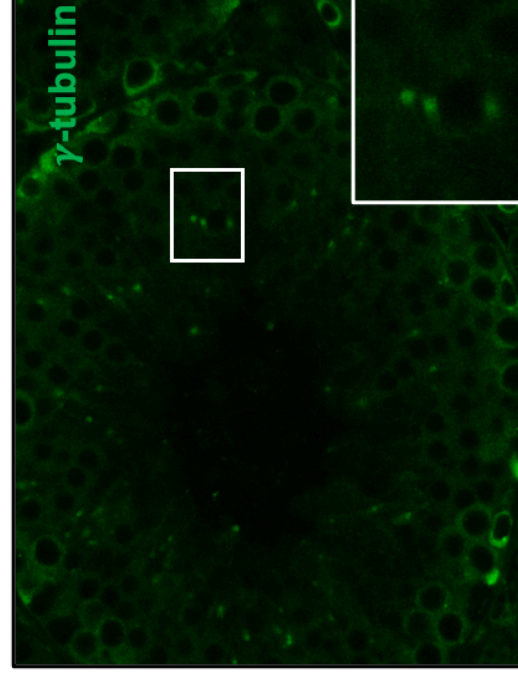

Supplement: supp [file elife-79620-supp-v1.zip]

**Figure 7 – figure supplement 2**

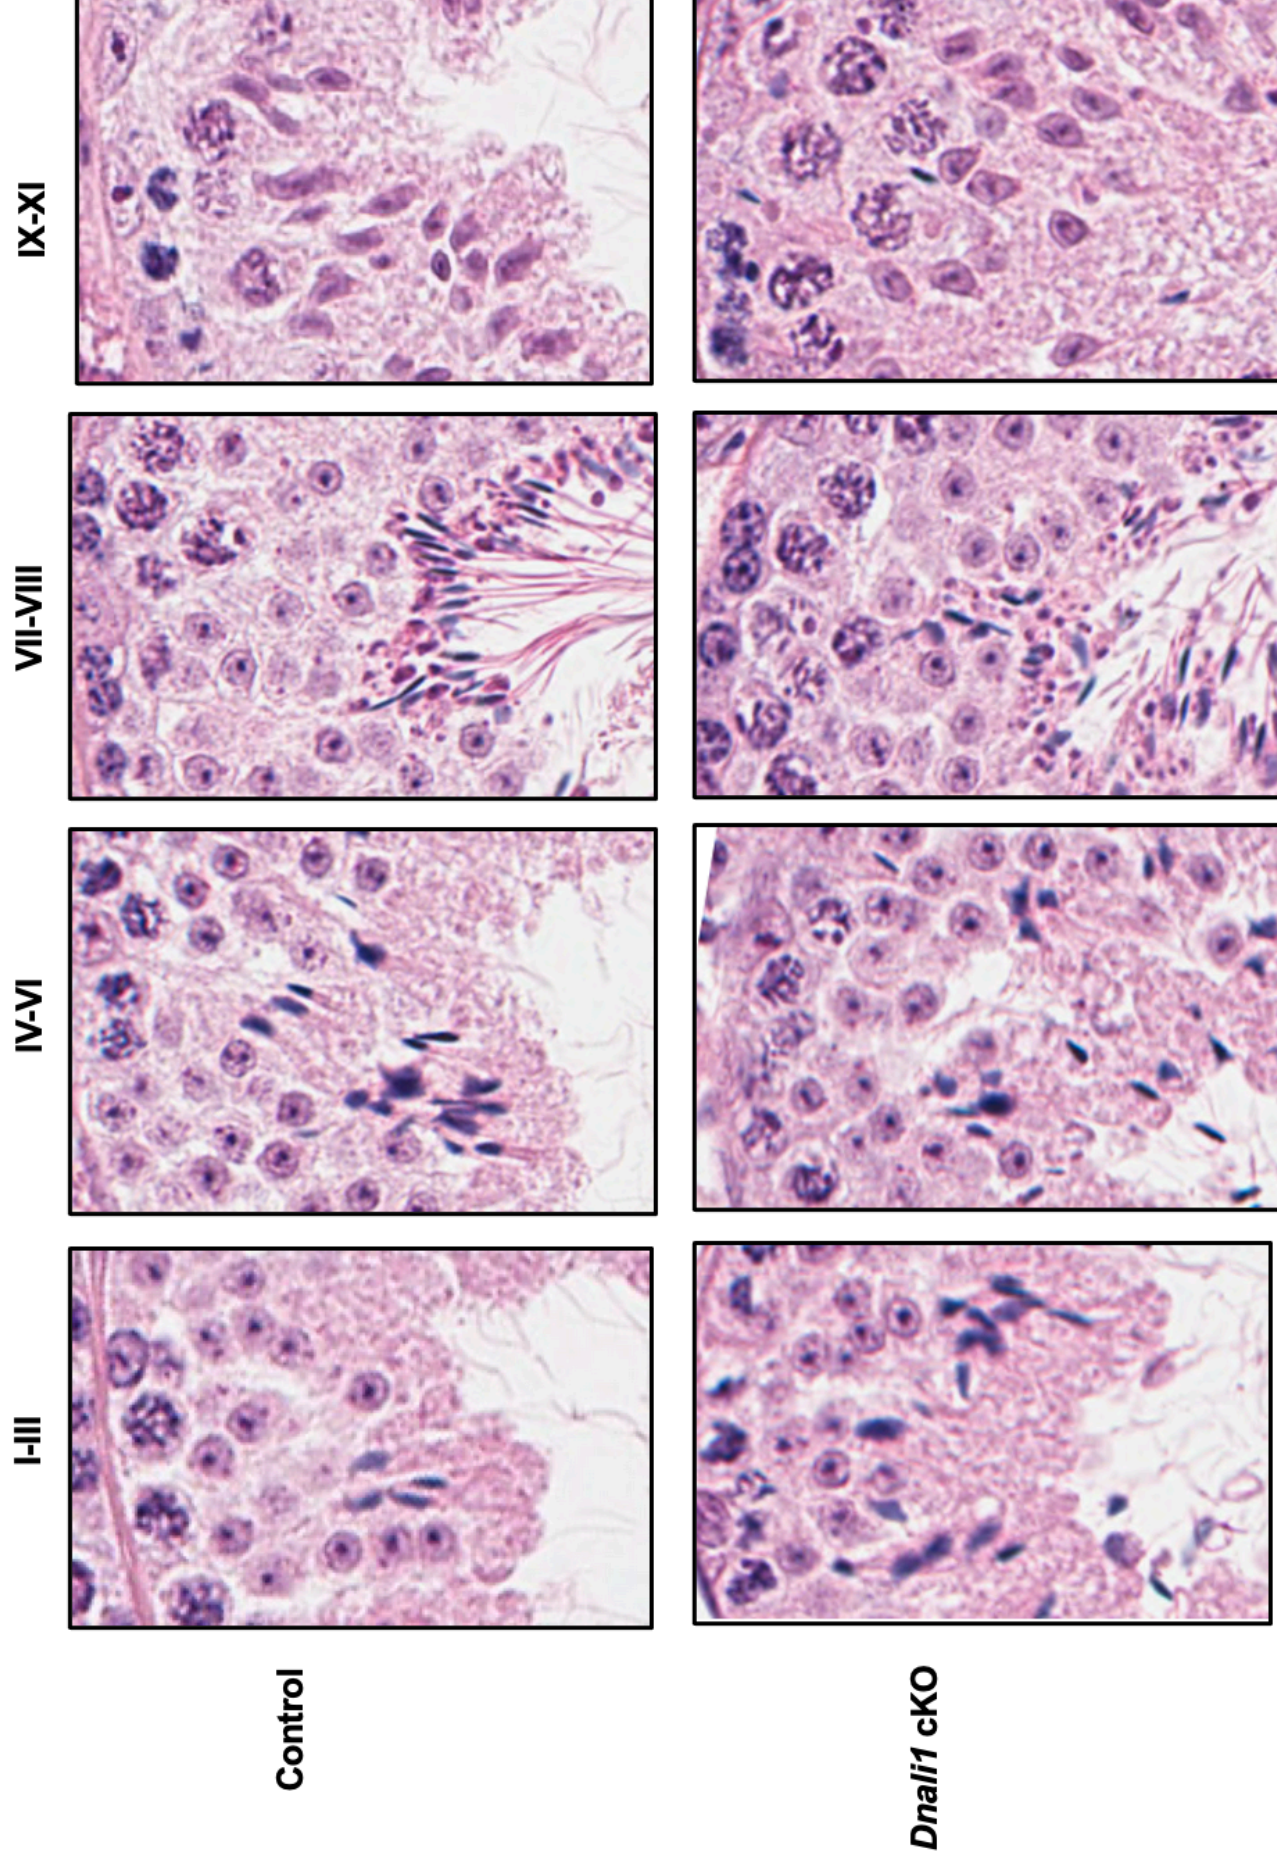

Supplement: supp [file elife-79620-supp-v1.zip]

**Figure 8 – figure supplement 1**

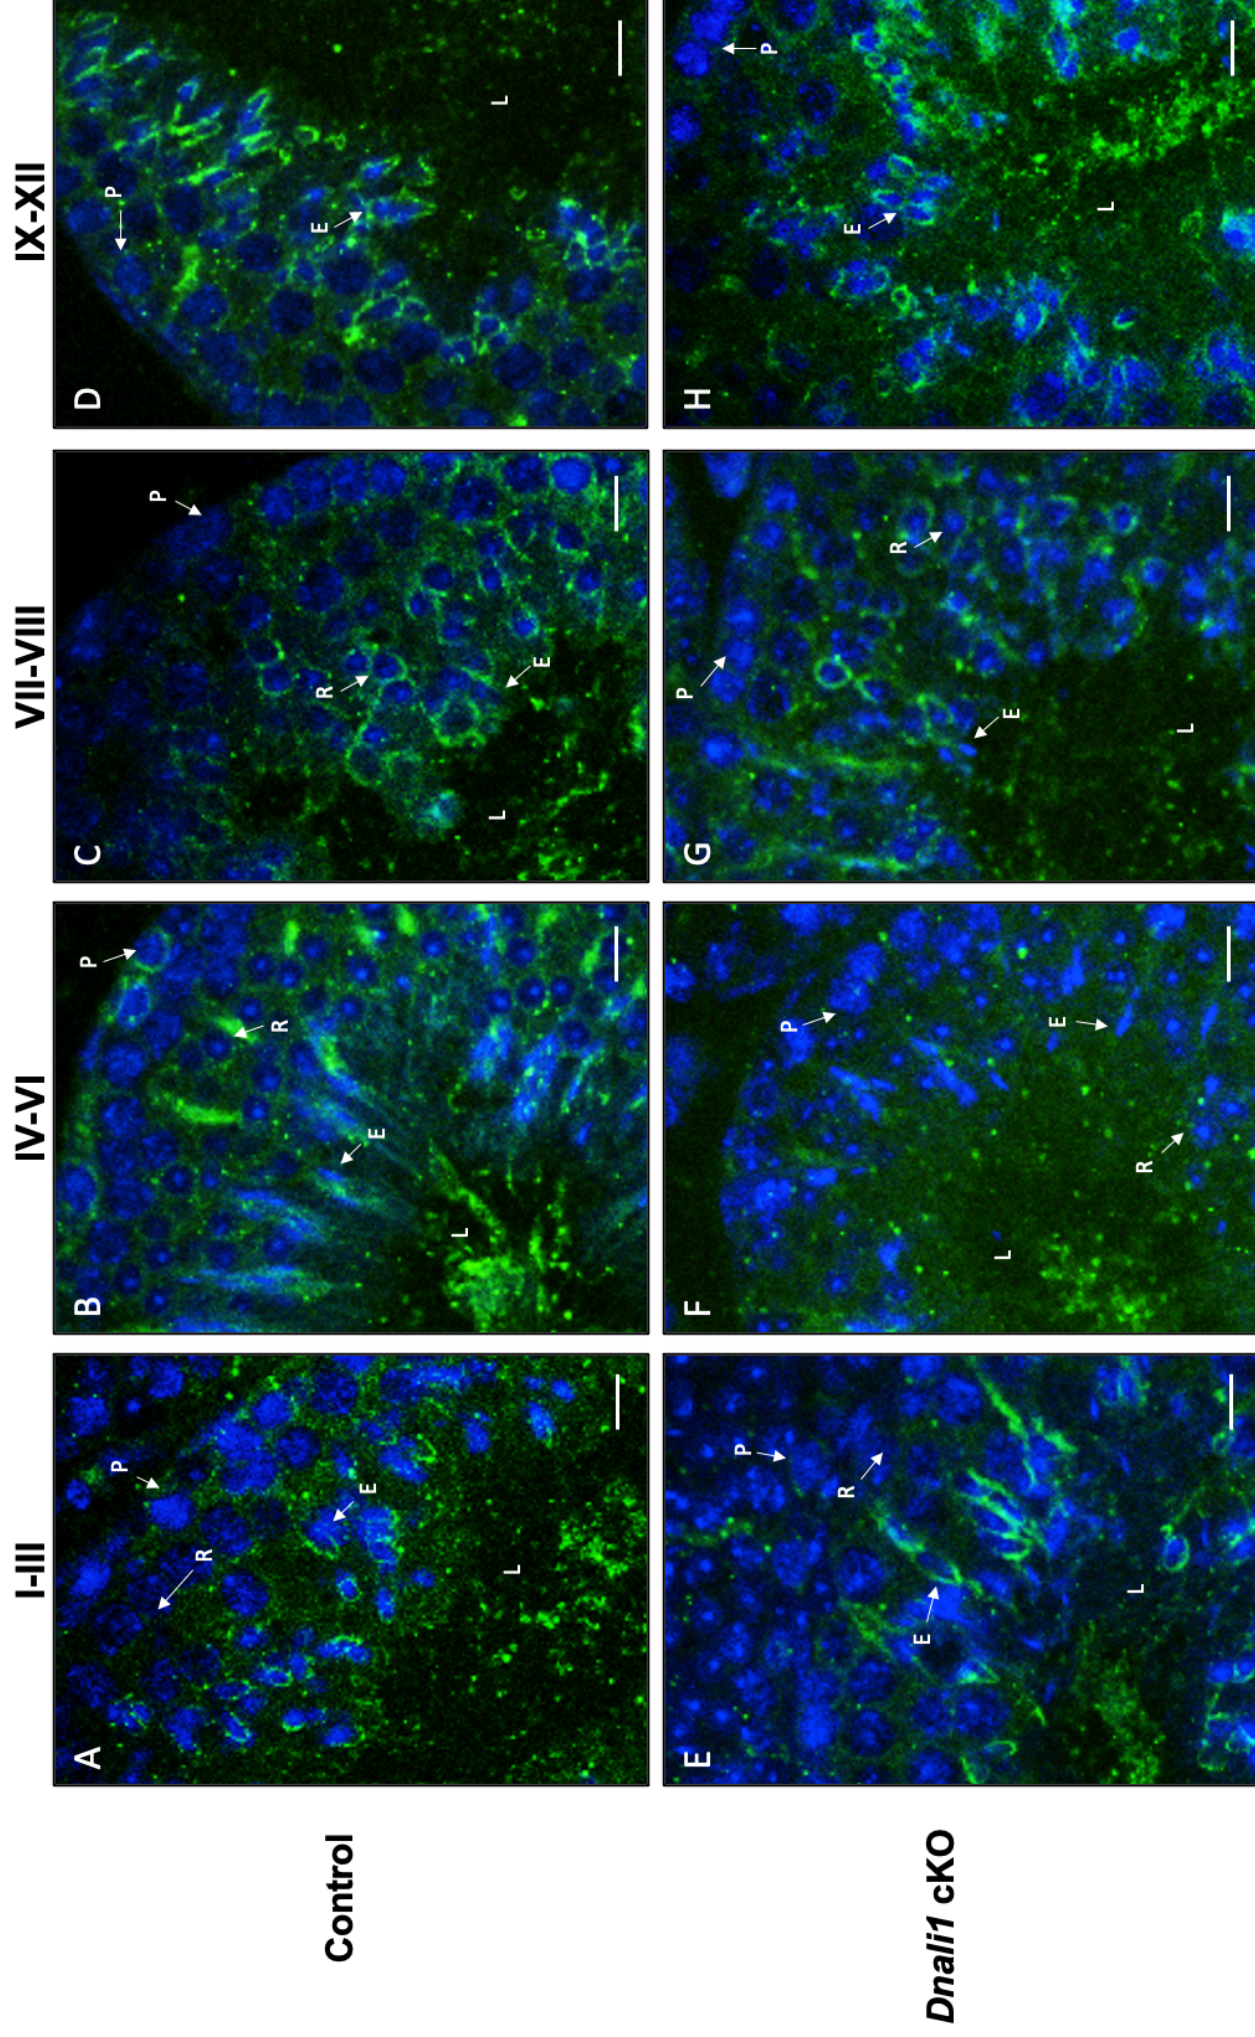

Supplement: supp [file elife-79620-supp-v1.zip]

# Figure 11 – figure supplement 4

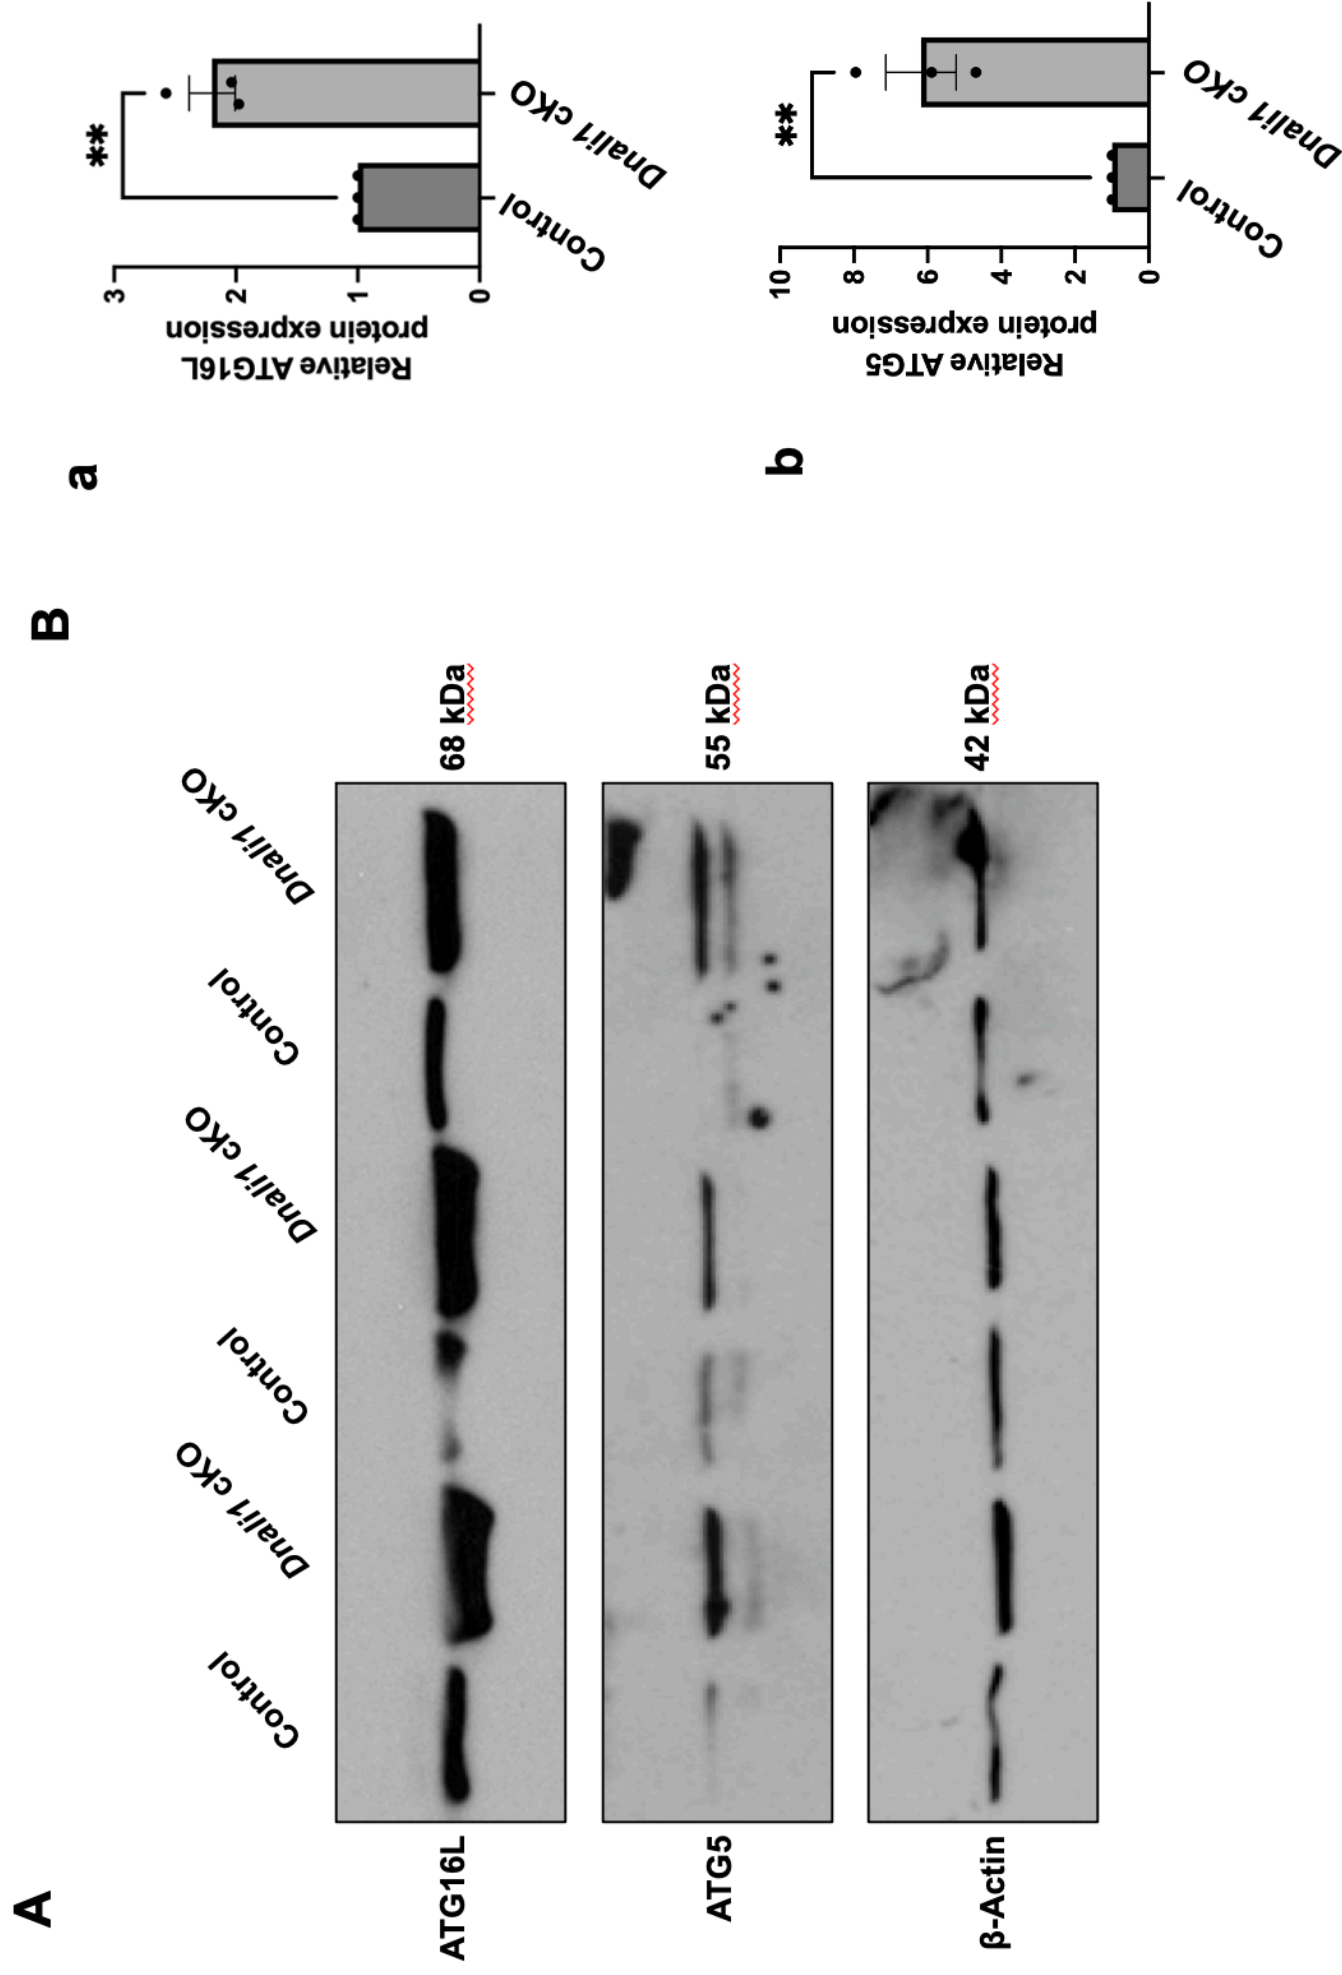

Supplement: supp [file elife-79620-supp-v1.zip]

Figure 5 – figure supplement 2

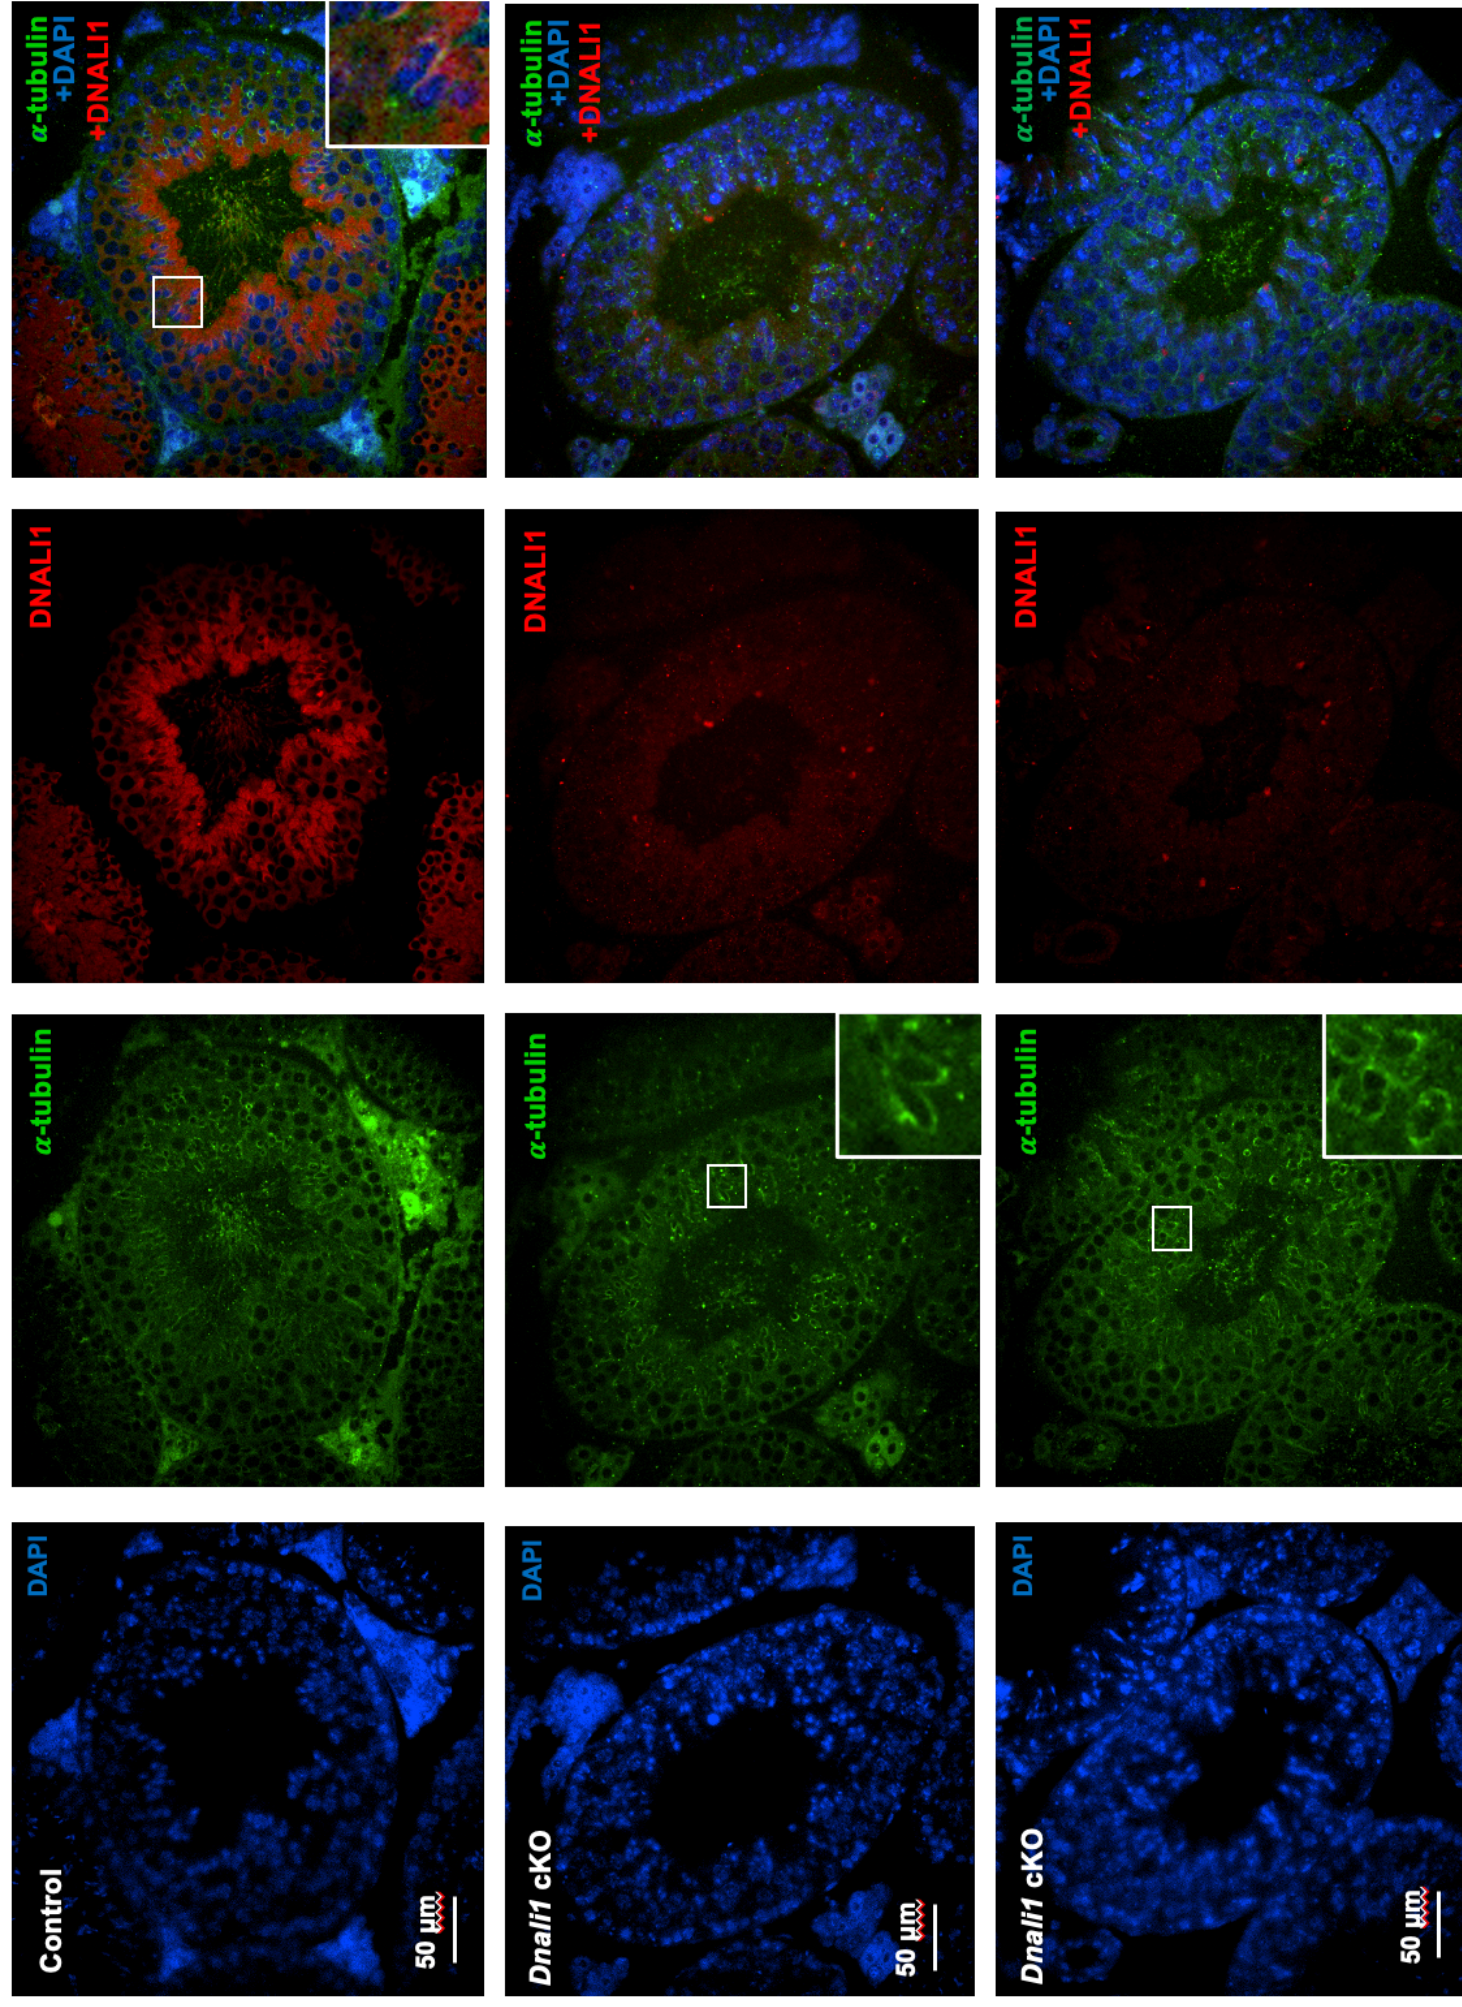

Supplement: supp [file elife-79620-supp-v1.zip]

## Figure 9 – figure supplement 1

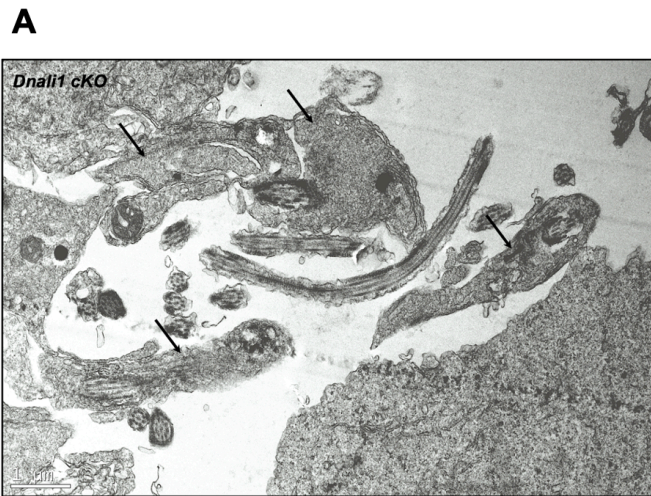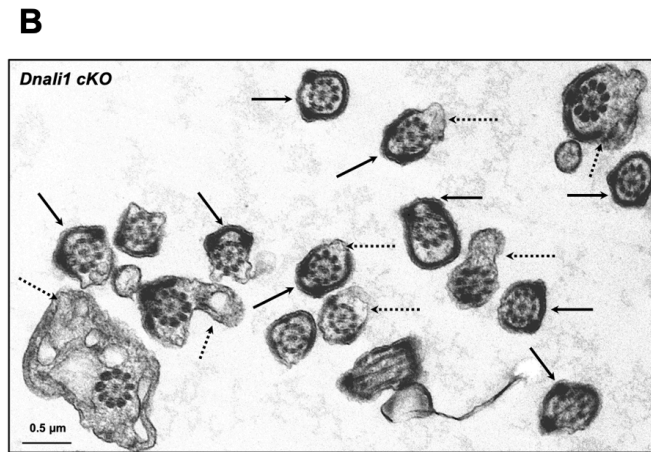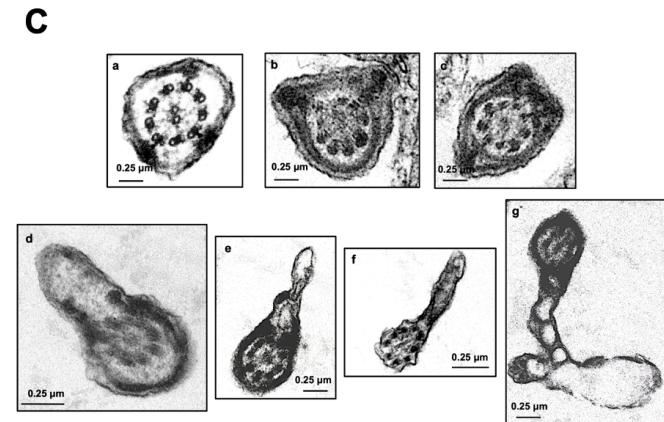

Supplement: supp [file elife-79620-supp-v1.zip]

Figure 11 – figure supplement 3

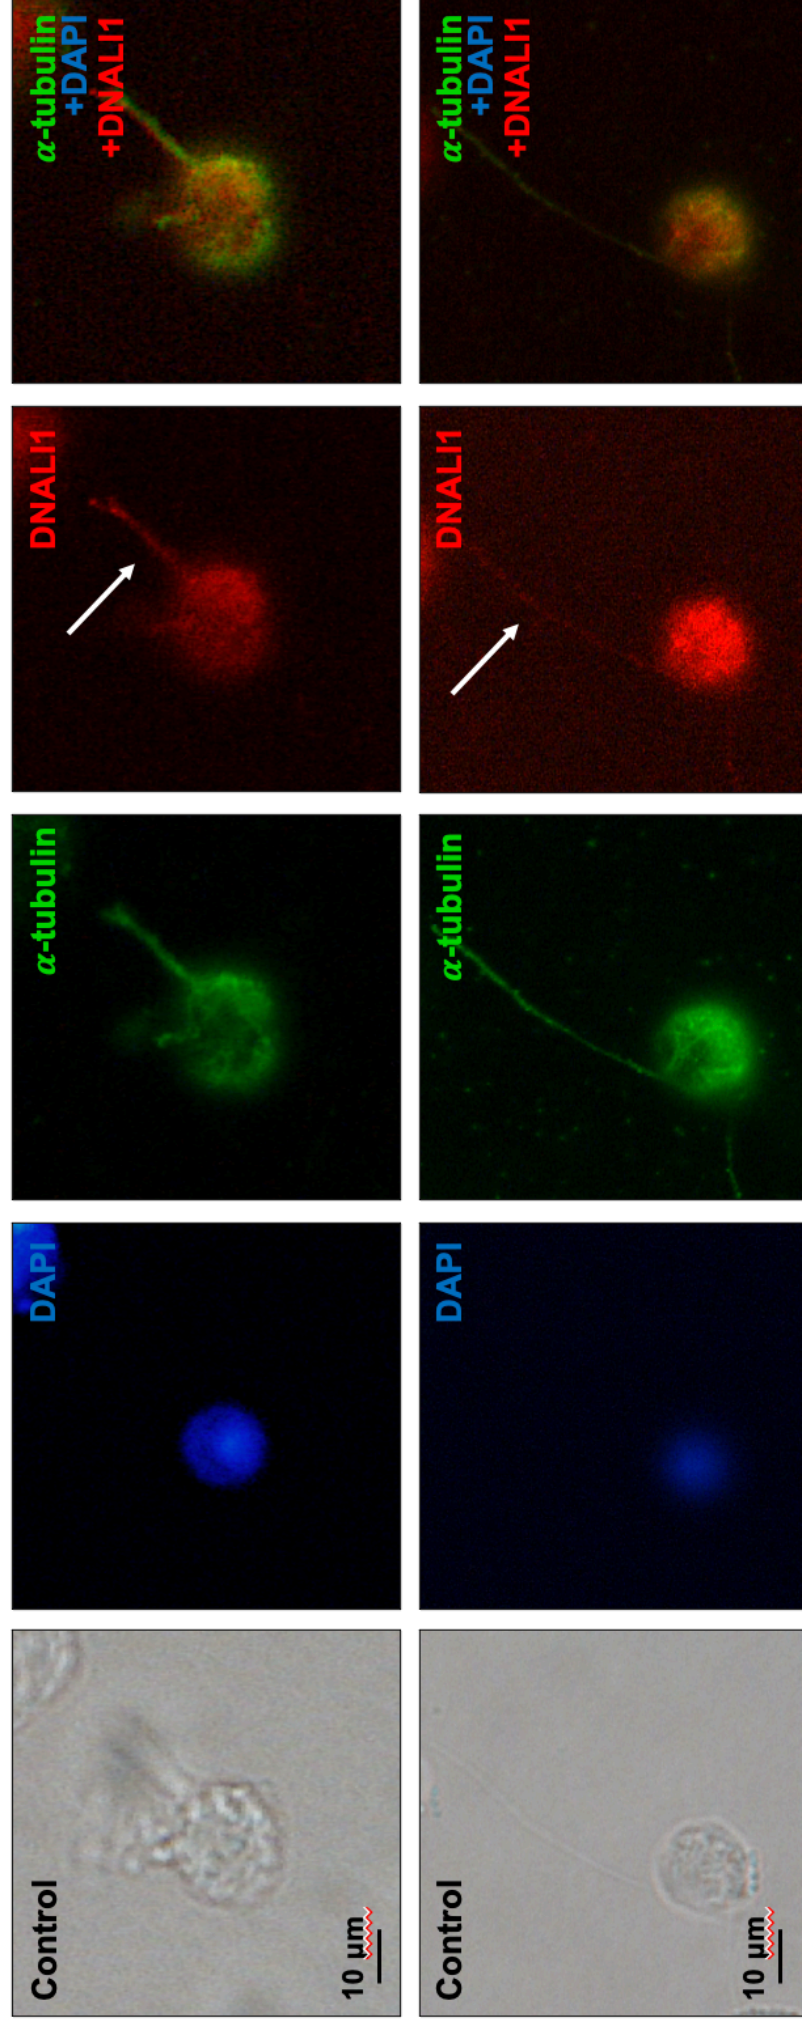

Supplement: supp [file elife-79620-supp-v1.zip]

**Figure 1 - Figure Supplement 1**

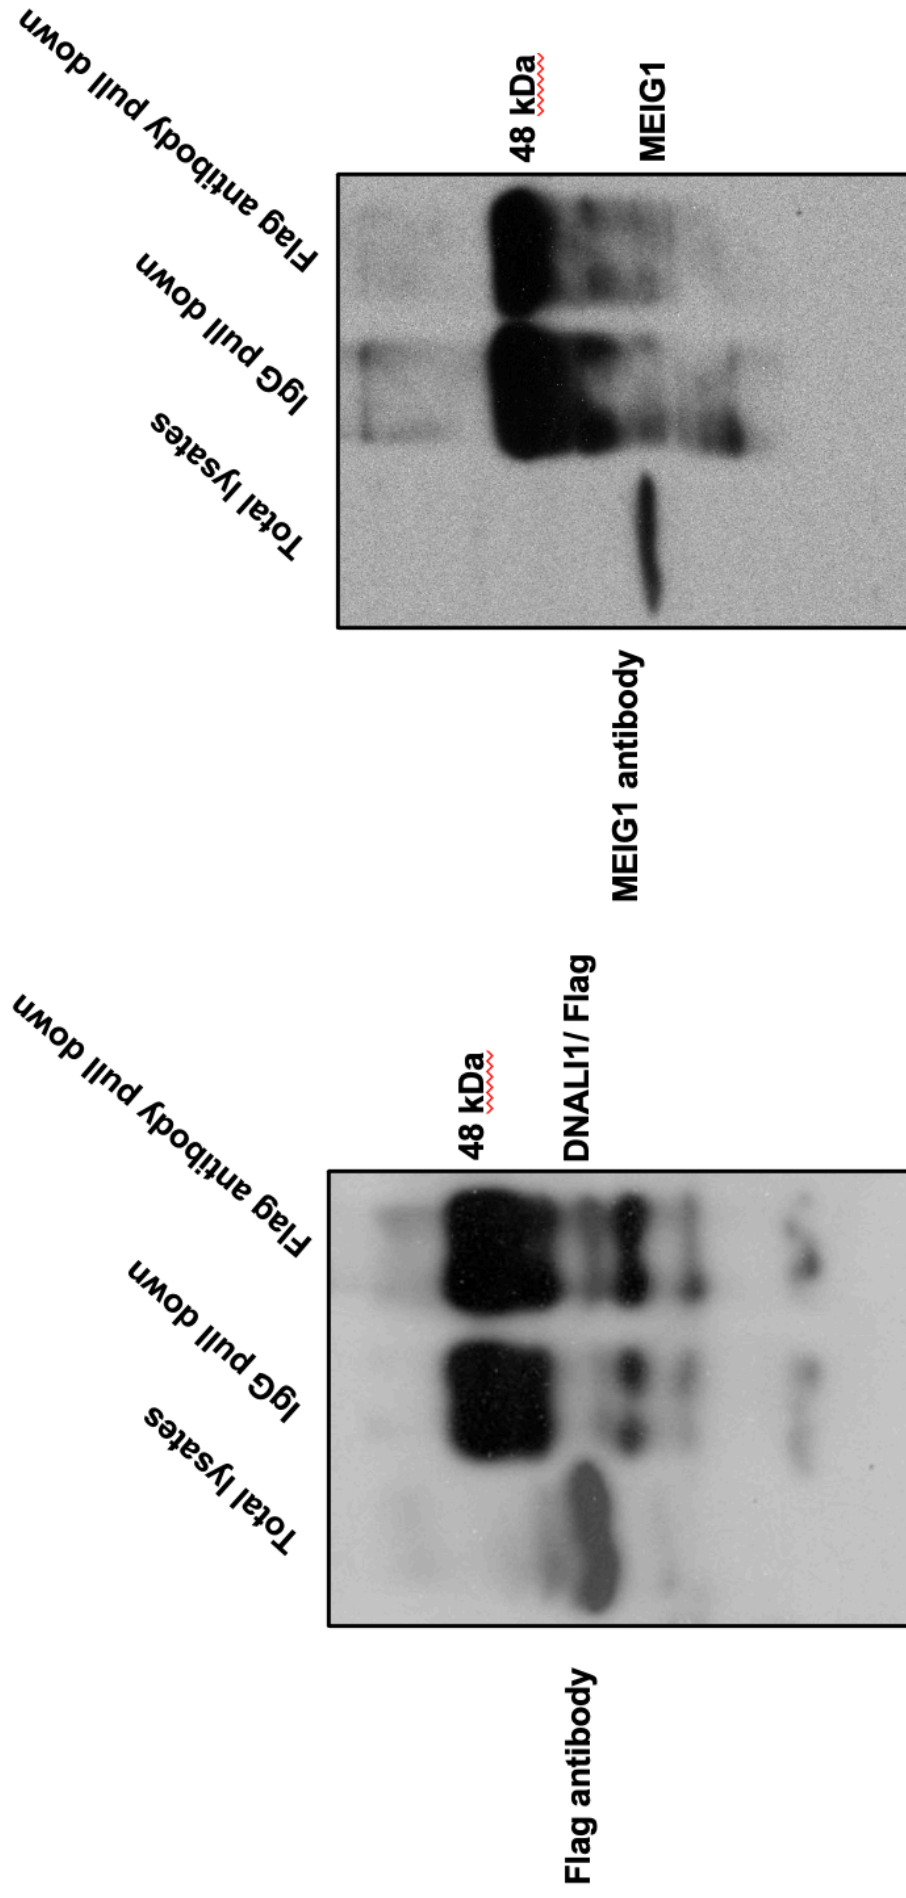

Supplement: supp [file elife-79620-supp-v1.zip]

**Figure 5 – figure supplement 3**

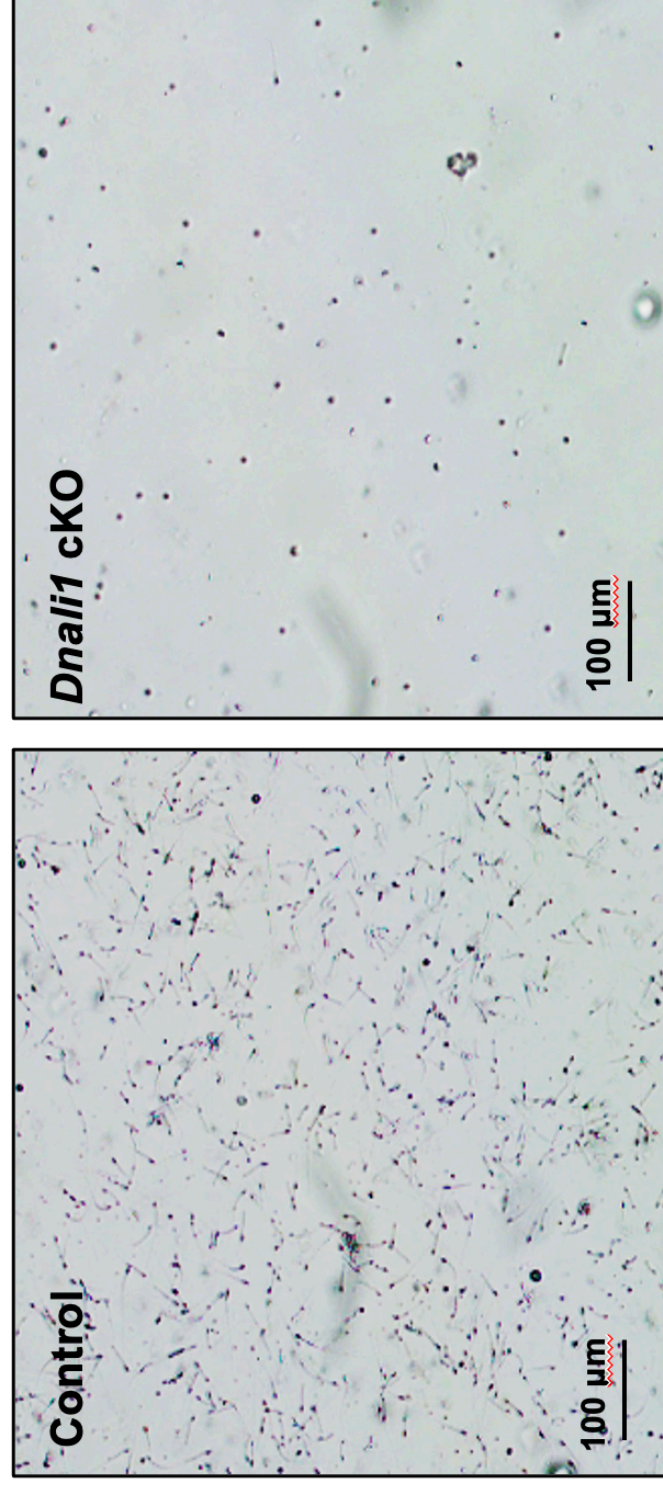

Supplement: supp [file elife-79620-supp-v1.zip]

**Figure 11 – figure supplement 1**

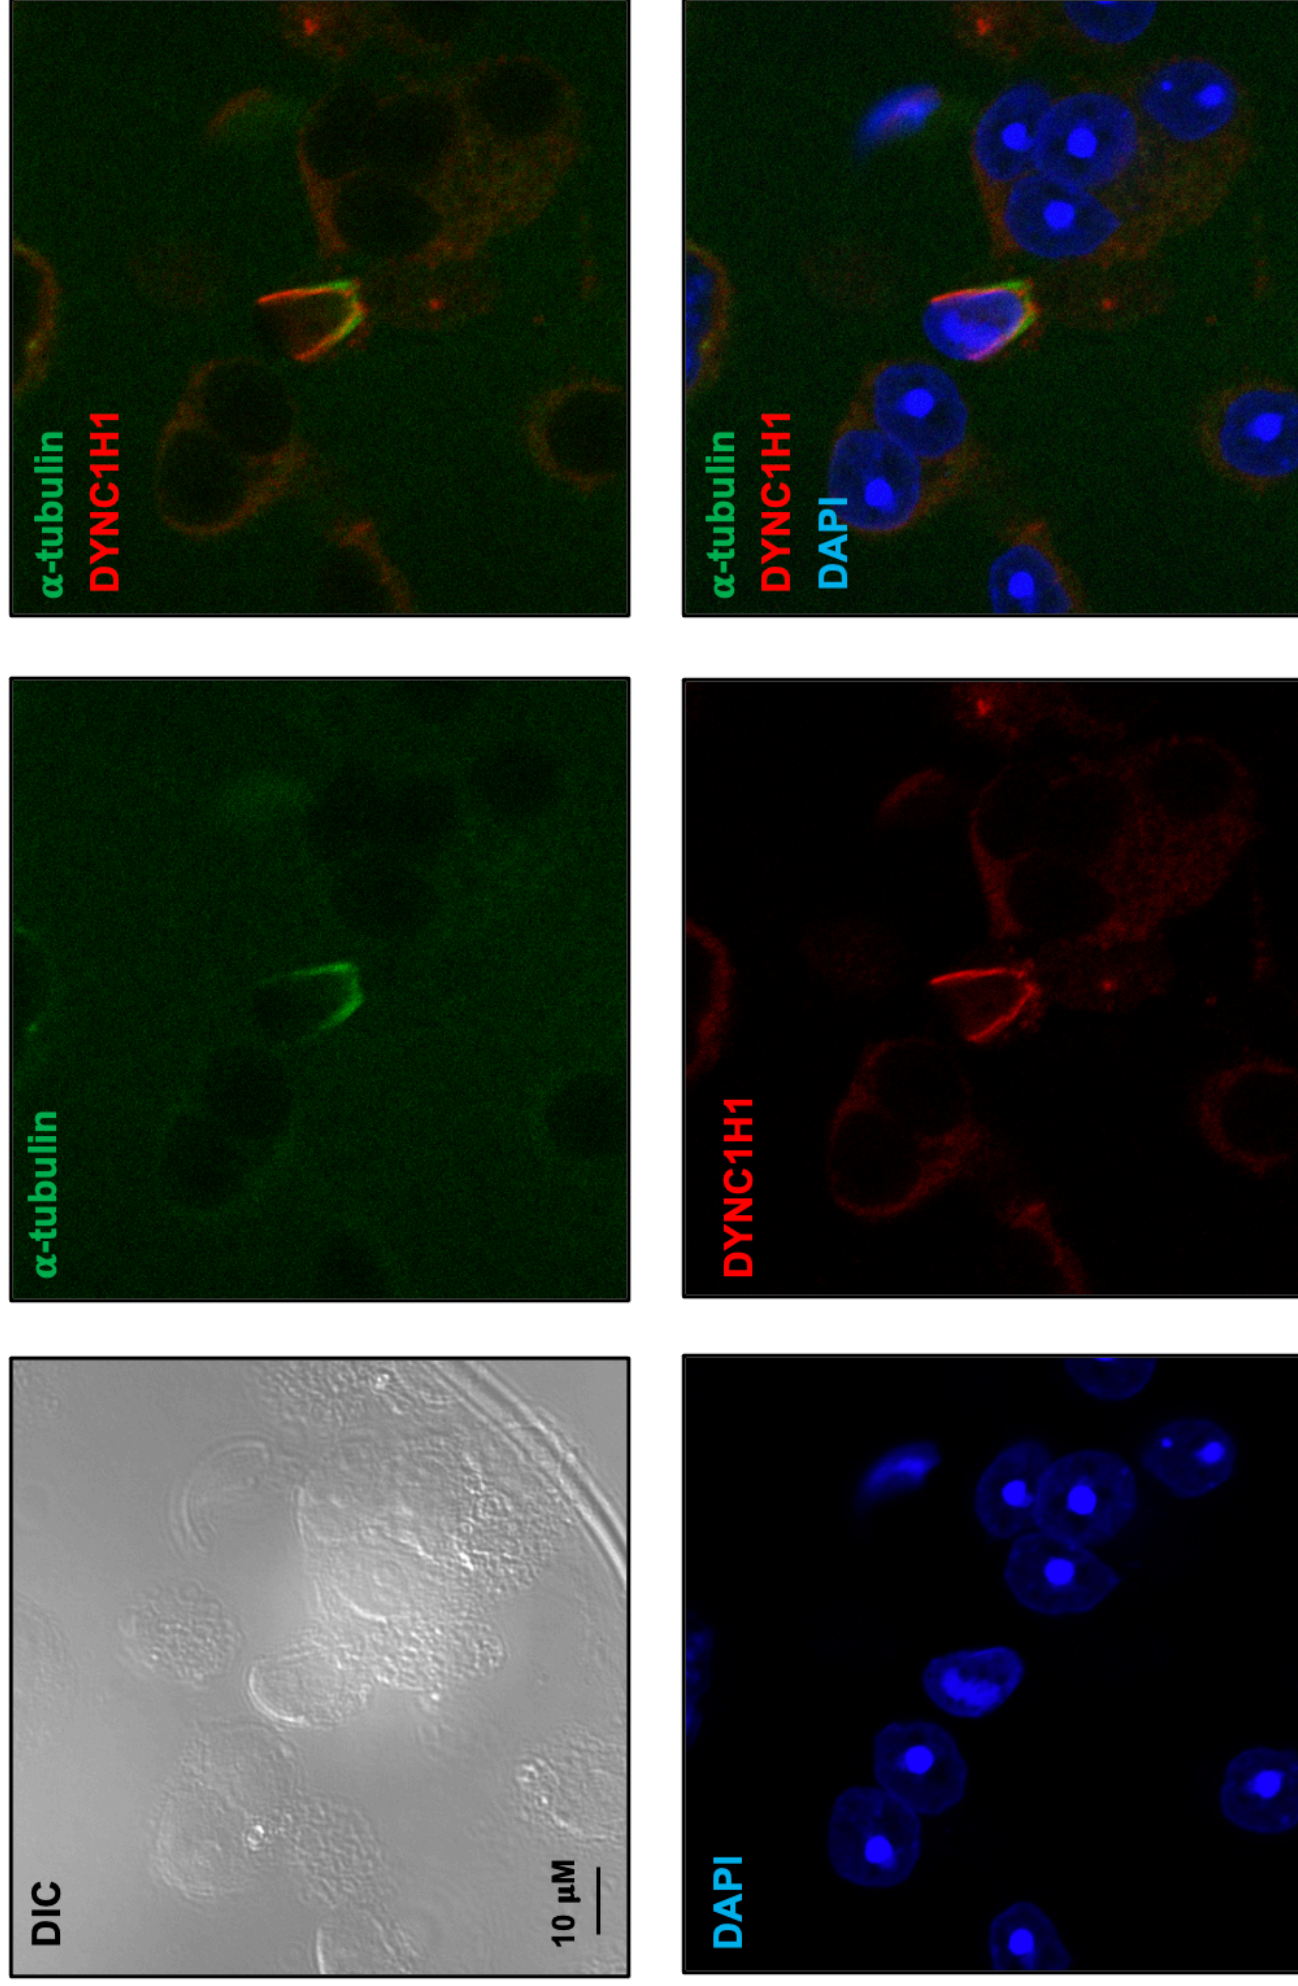

Supplement: supp [file elife-79620-supp-v1.zip]
